# Supplementary material for: Luminescent Tb(iii) and Sm(iii) complexes with a 1,4,7-triazacyclononane-based tris-aryloxide ligand for high-performance oxygen sensors
Source: Royal Society of Chemistry journal article supplement (doi:10.1039/c7dt01388d), 2017-01-01
Supplement: c7dt01388d1.pdf [file c7dt01388d1.pdf]

## Electronic Supplementary Information (ESI) – Table of Contents

### Luminescent Tb(III) and Sm(III) complexes with a 1,4,7-triazacyclononane-based tris-aryloxide ligand for high-performance oxygen sensors

Hidetaka Nakai,<sup>\*a,b,c,d</sup> Masafumi Kuyama,<sup>a</sup> Juncheol Seo,<sup>a,c</sup> Takahiro Goto,<sup>a</sup>  
Takahiro Matsumoto<sup>a,b,c</sup> and Seiji Ogo<sup>\*a,b,c</sup>

<sup>a</sup> Department of Chemistry and Biochemistry, Graduate School of Engineering, Kyushu University,  
744 Moto-oka, Nishi-ku, Fukuoka 819-0395, Japan

<sup>b</sup> Centre for Small Molecule Energy, Kyushu University,  
744 Moto-oka, Nishi-ku, Fukuoka 819-0395, Japan

<sup>c</sup> International Institute for Carbon-Neutral Energy Research (WPI-I2CNER), Kyushu University,  
744 Moto-oka, Nishi-ku, Fukuoka 819-0395, Japan

<sup>d</sup> Department of Applied Chemistry, Faculty of Science and Engineering, Kindai University,  
3-4-1 Kowakae, Higashi-Osaka, Osaka 577-8502, Japan

#### Tables

|                                                                                                                            |     |
|----------------------------------------------------------------------------------------------------------------------------|-----|
| <b>Table S1</b> Crystallographic data for <b>1</b> <sup>Sm</sup> .....                                                     | S 2 |
| <b>Table S2</b> Continuous shape measures (CSM) values calculated for the Sm <sup>3+</sup> in <b>1</b> <sup>Sm</sup> ..... | S 3 |

#### Figures

|                                                                                                                                          |     |
|------------------------------------------------------------------------------------------------------------------------------------------|-----|
| <b>Fig. S1</b> Absorption and excitation spectra of <b>1</b> <sup>Sm</sup> .....                                                         | S 4 |
| <b>Fig. S2</b> Luminescence decay curve of <b>1</b> <sup>Sm</sup> .....                                                                  | S 4 |
| <b>Fig. S3</b> CIE chromaticity diagram of <b>1</b> <sup>Tb</sup> /PS, <b>1</b> <sup>Sm</sup> /PS and <b>1</b> <sup>TbSm</sup> /PS ..... | S 5 |
| <b>Fig. S4</b> Excitation spectra of <b>1</b> <sup>Tb</sup> /PS and <b>1</b> <sup>Sm</sup> /PS .....                                     | S 6 |

#### Legends of Supporting Videos

|                                                                                                 |     |
|-------------------------------------------------------------------------------------------------|-----|
| <b>Video S1</b> Reversible changes of luminescent intensity of <b>1</b> <sup>Tb</sup> /PS ..... | S 7 |
| <b>Video S2</b> Reversible changes of luminescent color of <b>1</b> <sup>TbSm</sup> /PS .....   | S 7 |

## Tables

**Table S1** Crystallographic data for **1<sup>Sm</sup>**

|                                                    | <b>1<sup>Sm</sup></b>                                            |
|----------------------------------------------------|------------------------------------------------------------------|
| Formula                                            | C <sub>37</sub> H <sub>50</sub> N <sub>3</sub> O <sub>4</sub> Sm |
| <i>F</i> <sub>w</sub>                              | 751.22                                                           |
| Crystal system                                     | triclinic                                                        |
| Space group                                        | <i>P</i> -1 (No. 2)                                              |
| <i>a</i> (Å)                                       | 7.930(3)                                                         |
| <i>b</i> (Å)                                       | 14.405(5)                                                        |
| <i>c</i> (Å)                                       | 16.407(4)                                                        |
| $\alpha$ (deg)                                     | 68.230(11)                                                       |
| $\beta$ (deg)                                      | 76.869(14)                                                       |
| $\gamma$ (deg)                                     | 84.941(14)                                                       |
| <i>V</i> (Å <sup>3</sup> )                         | 1694.9(10)                                                       |
| <i>Z</i>                                           | 2                                                                |
| $\mu$ (cm <sup>-1</sup> )                          | 17.79                                                            |
| <i>F</i> (000)                                     | 774.00                                                           |
| <i>D</i> <sub>calcd</sub> (g/cm <sup>3</sup> )     | 1.472                                                            |
| Temperature (K)                                    | 93                                                               |
| Reflections collected                              | 20543                                                            |
| Independent reflection                             | 7698                                                             |
|                                                    | ( <i>R</i> <sub>int</sub> = 0.032)                               |
| Data/parameters                                    | 7698/412                                                         |
| <i>R</i> <sub>1</sub> [ <i>I</i> > 2σ( <i>I</i> )] | 0.0305                                                           |
| <i>wR</i> <sub>2</sub> (all data)                  | 0.0699                                                           |
| Goodness-of-fit                                    | 1.099                                                            |

**Table S2** Continuous shape measures (CSM) values calculated for the Sm<sup>3+</sup> in **1**<sup>Sm</sup>

|                        | HP-7   | HPY-7  | PBPY-7 | COC-7 | CTPR-7 | JPBPY-7 | JETPY-7 |
|------------------------|--------|--------|--------|-------|--------|---------|---------|
| <b>1</b> <sup>Sm</sup> | 33.718 | 20.512 | 8.700  | 1.039 | 2.437  | 11.363  | 13.857  |

HP-7 (D<sub>7h</sub>)      Heptagon

HPY-7 (C<sub>6v</sub>)      Hexagonal pyramid

PBPY-7 (D<sub>5h</sub>)      Pentagonal bipyramid

COC-7 (C<sub>3v</sub>)      Monocapped octahedron (Capped octahedron)

CTPR-7 (C<sub>2v</sub>)      Monocapped trigonal prism (Capped trigonal prism)

JPBPY-7 (D<sub>5h</sub>)      Johnson pentagonal bipyramid (J13)

JETPY-7 (C<sub>3v</sub>)      Johnson elongated triangular pyramid (J7)

M, Llunell, D. Casanova, J. Cirera, P. Alemany and S. Alvarez, *SHAPE, version 2.1*, Barcelona, 2013.

D. Casanova, P. Alemany, J. M. Bofill and S. Alvarez, *Chem. – Eur. J.*, 2003, **9**, 1281.

## Figures

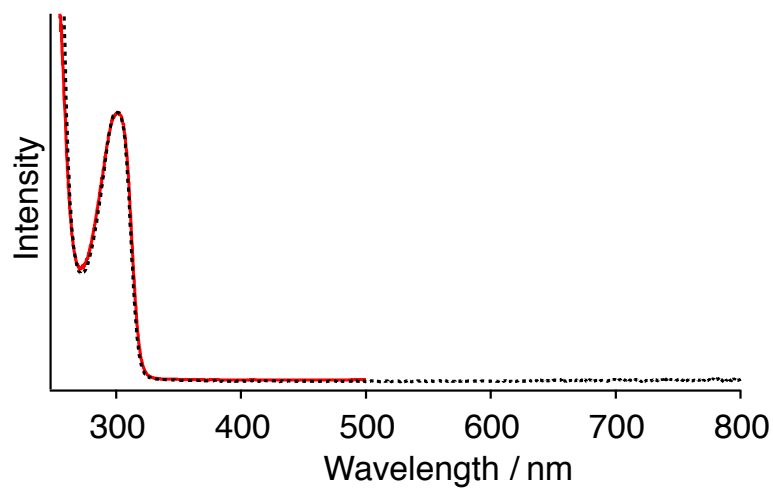

**Fig. S1** Absorption (black dot) and excitation (red) spectra of  $1^{\text{Sm}}$  in THF at room temperature. The excitation spectrum was detected at 648 nm.

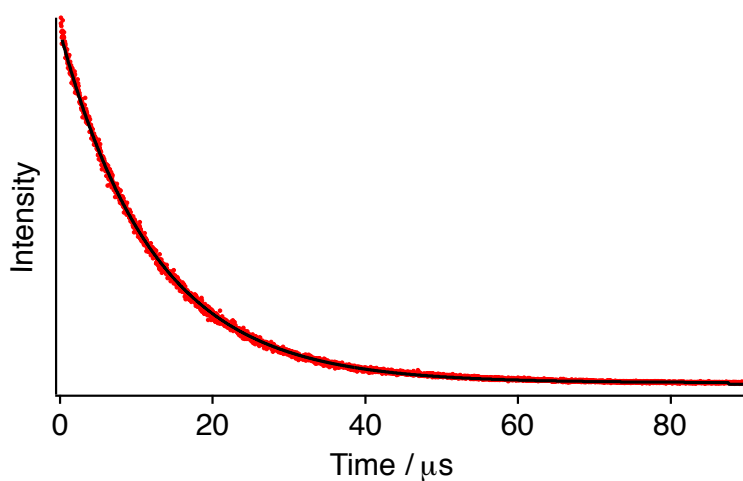

**Fig. S2** Luminescence decay curve of  $1^{\text{Sm}}$  under air (red, 12.2  $\mu\text{s}$ ) in THF at room temperature. The decay was monitored by a TBX-850 detector (250–850 nm) with a Y47 color filter ( $\lambda_{\text{ex}} = 300$  nm). Fitted by single exponential curve (black).

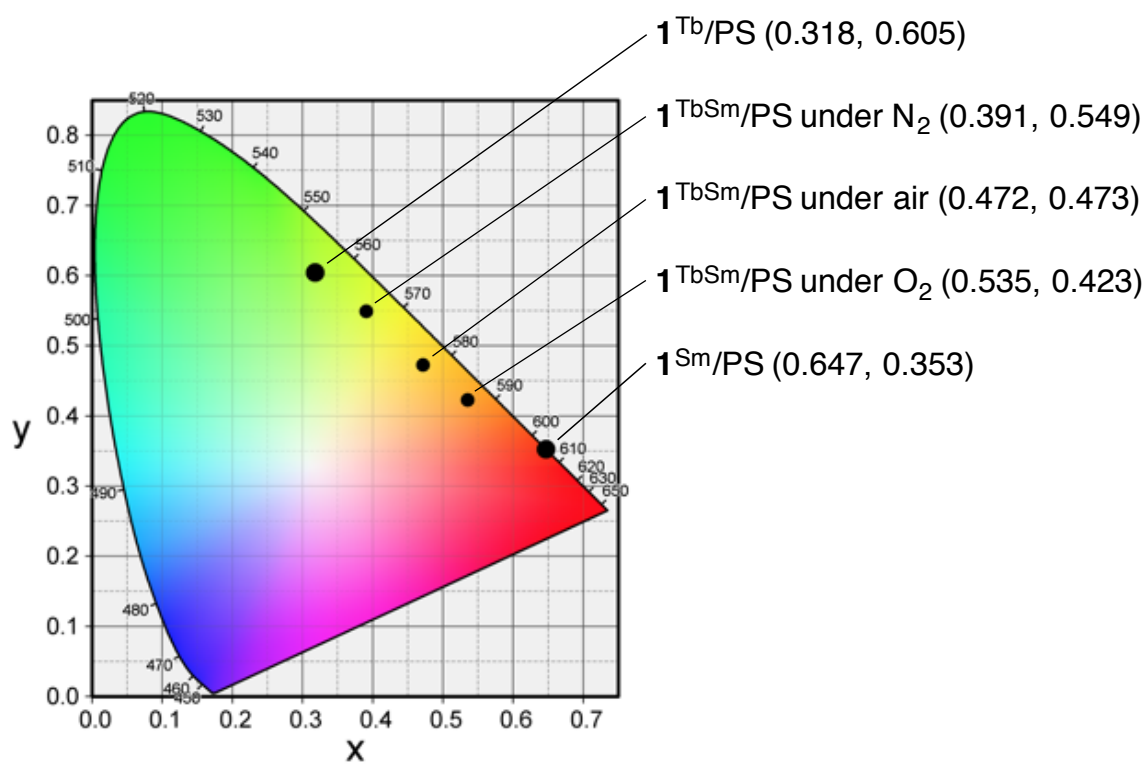

**Fig. S3** CIE 1931 chromaticity diagram of  $\mathbf{1}^{\text{Tb}}/\text{PS}$ ,  $\mathbf{1}^{\text{Sm}}/\text{PS}$  and  $\mathbf{1}^{\text{TbSm}}/\text{PS}$  ( $\lambda_{\text{ex}} = 300 \text{ nm}$ ).

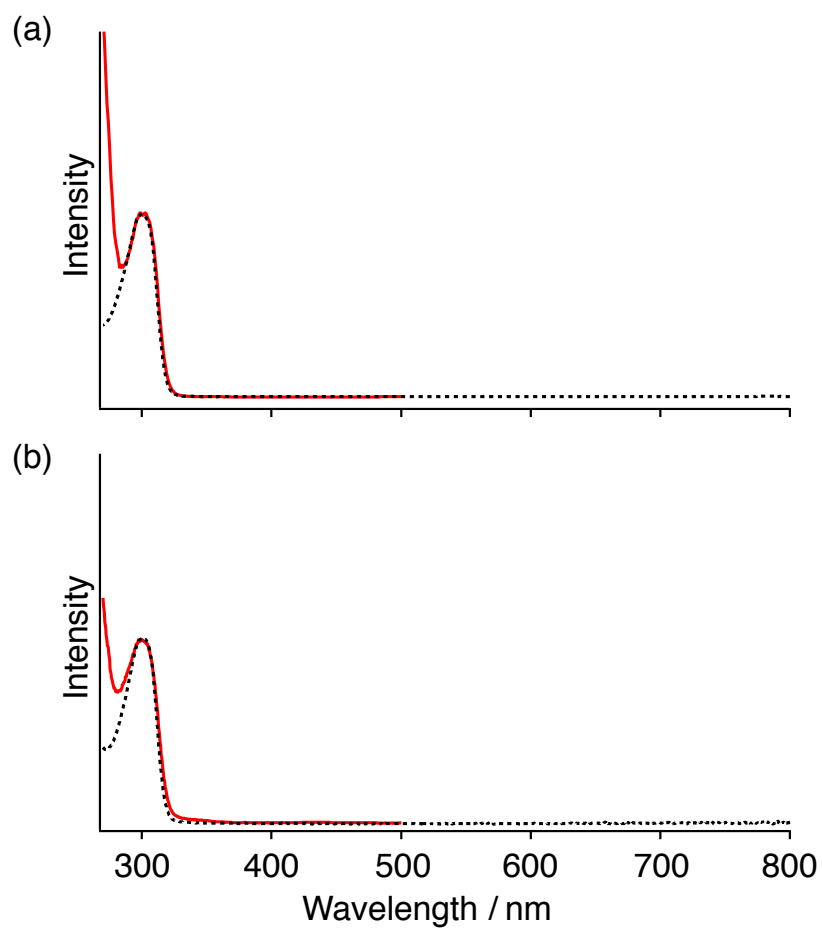

**Fig. S4** Excitation spectra (red) of (a)  $1^{\text{Tb}}/\text{PS}$  and (b)  $1^{\text{Sm}}/\text{PS}$  at room temperature (Excitation spectra of  $1^{\text{Tb}}/\text{PS}$  and  $1^{\text{Sm}}/\text{PS}$  were detected at 547 and 647 nm, respectively) and absorption spectra (black dot) of (a)  $1^{\text{Tb}}$  and (b)  $1^{\text{Sm}}$  in THF at room temperature.

## **Legends of Supporting Videos**

**Video S1.** Reversible changes of luminescent intensity of **1**<sup>Tb</sup>/PS by alternating changes in the oxygen concentration ( $\lambda_{\text{ex}} = 300 \text{ nm}$ ).

**Video S2.** Reversible changes of luminescent color of **1**<sup>TbSm</sup>/PS by alternating changes in the oxygen concentration ( $\lambda_{\text{ex}} = 300 \text{ nm}$ ).
